# Supplementary material for: Highly stable ionic liquid-in-water emulsions as a new class of fluorescent sensors for metal ions: the case study of Fe3+ sensing
Source: Royal Society of Chemistry journal article supplement (doi:10.1039/c5ra05055c), 2015-01-01
Supplement: c5ra05055c1.pdf [file c5ra05055c1.pdf]

## Electronic Supporting Information

### **Highly stable ionic liquid-in-water emulsions as a new class of fluorescent sensors for metal ions: the study case of Fe<sup>3+</sup> sensing.**

*Alexandre Bettoschi, Andrea Bencini, Debora Berti, Claudia Caltagirone, Luca Conti, Davide Demurtas, Claudia Giorgi, Francesco Isaia, Vito Lippolis, Marianna Mamusa, Sergio Murgia.*

**Table S1.** Protonation constants of NEA and OAcH (H<sub>2</sub>O/EtOH 50:50 (v/vol), NaCl 0.1 M, 298 K) and (NEAH)<sup>+</sup>/(OAc)<sup>-</sup> (H<sub>2</sub>O solution, NaCl 0.1 M, 298 K).

| Reaction                                                                               | LogK              |
|----------------------------------------------------------------------------------------|-------------------|
| (NEA) + H <sup>+</sup> = (NEAH) <sup>+</sup>                                           | 8.41 (2)          |
| (OAc) <sup>-</sup> + H <sup>+</sup> = (OAcH)                                           | 5.70 (6)          |
| (NEA)/(OAc) <sup>-</sup> + H <sup>+</sup> = (NEAH) <sup>+</sup> /(OAc) <sup>-</sup>    | 10.9 <sup>a</sup> |
| (NEAH) <sup>+</sup> /(OAc) <sup>-</sup> + H <sup>+</sup> = (NEAH) <sup>+</sup> /(OAcH) | 2.9 (1)           |

<sup>a</sup>Only a rough estimation of the equilibrium constant for protonation of (NEA)/(OAc)<sup>-</sup> can be given due to partial formation of sodium oleate micelles above pH 10.

**Table S2.** Formation constants of the Fe<sup>3+</sup> complexes with NEA (H<sub>2</sub>O/EtOH 50:50 (v/v), NaCl 0.1 M, 298 K) and with (NEAH)<sup>+</sup>/(OAc)<sup>-</sup> (H<sub>2</sub>O solution, NaCl 0.1 M, 298 K)

| Reaction                                                                                                              | LogK      |
|-----------------------------------------------------------------------------------------------------------------------|-----------|
| 2(NEA) + Fe <sup>3+</sup> = [(NEA) <sub>2</sub> Fe] <sup>3+</sup>                                                     | 17.85 (9) |
| [(NEA) <sub>2</sub> Fe] <sup>3+</sup> + OH <sup>-</sup> = [(NEA) <sub>2</sub> Fe(OH)] <sup>2+</sup>                   | 11.08 (6) |
| [(NEA) <sub>2</sub> Fe(OH)] <sup>2+</sup> + 3OH <sup>-</sup> = [(NEA) <sub>2</sub> Fe(OH) <sub>4</sub> ] <sup>-</sup> | 6.9 (2)   |
| 2(NEA)/(OAc) <sup>-</sup> + Fe <sup>3+</sup> = [((NEA)/(OAc) <sup>-</sup> ) <sub>2</sub> Fe] <sup>+</sup>             | 22.95 (6) |

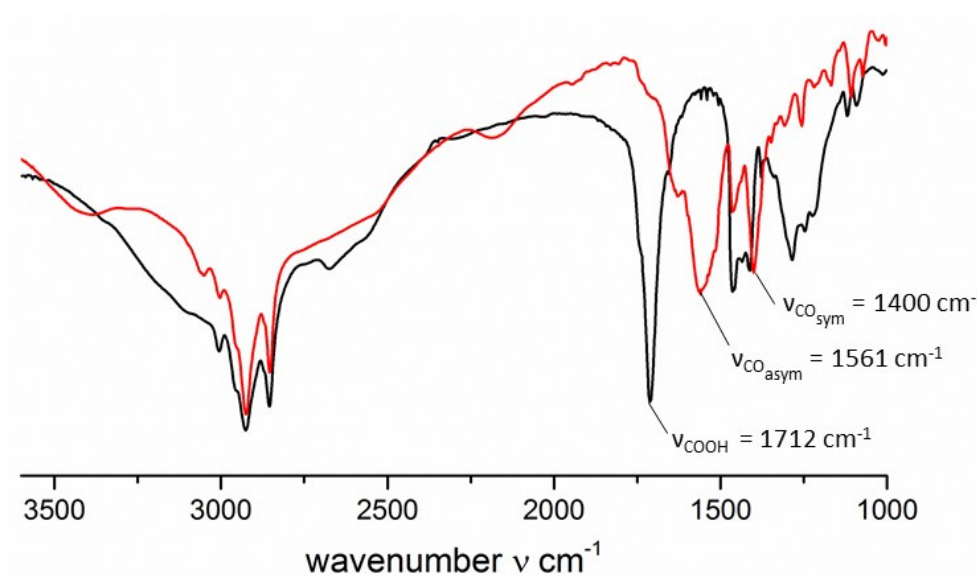

**Figure S1.** FT-IR spectra of oleic acid (black) and (NEAH)<sup>+</sup>/(OAc)<sup>-</sup> salt (red).

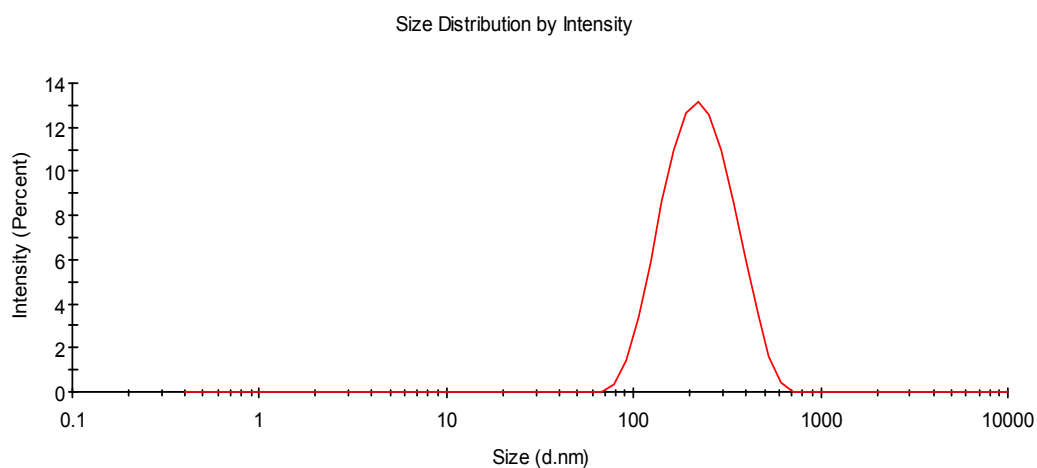

**Figure S2.** Dynamic light scattering of (NEAH)<sup>+</sup>/(OAc)<sup>-</sup> [ $8.82 \cdot 10^{-5} \text{ M}$ ] in milli-Q water (pH = 8.2). The average hydrodynamic parameter is 200 nm with a polydispersity index of 0.2.

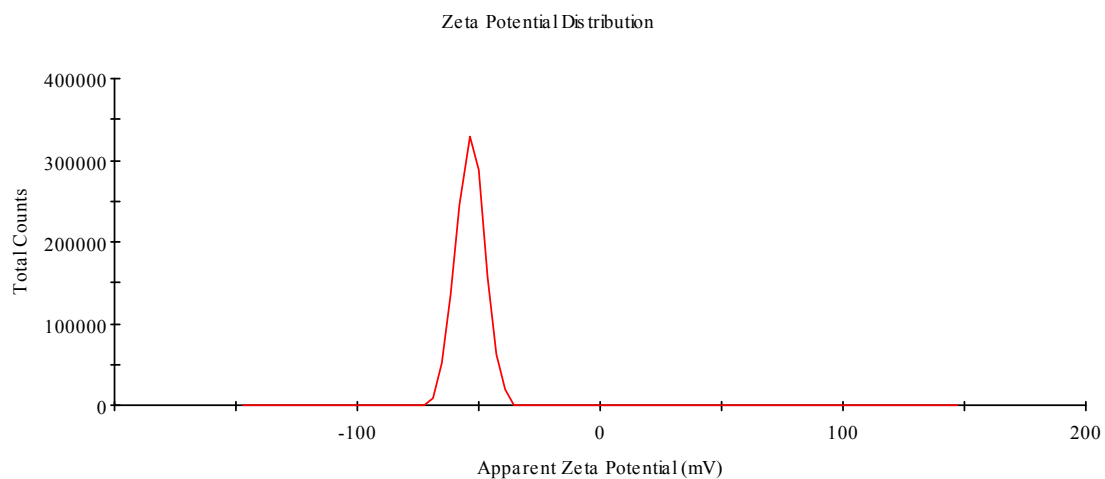

**Figure S3.**  $\zeta$ -potential of  $(\text{NEAH})^+/(\text{OAc})^-$  [ $8.82 \cdot 10^{-5}$  M] in milli-Q water, pH = 8.2.  $\zeta$ -potential is  $-53 \pm 1$  mV.

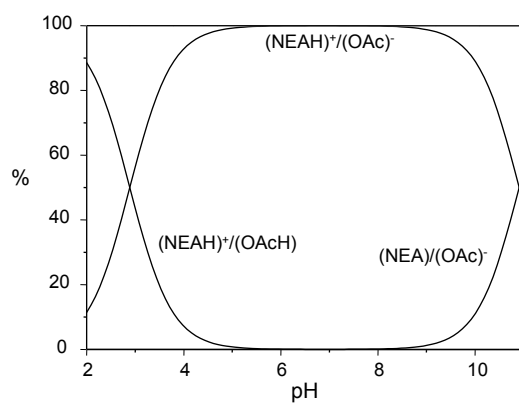

**Figure S4.** Distribution diagram of the protonated forms of  $(\text{NEA})/(\text{OAc})^-$  ( $\text{H}_2\text{O}$  solution, NaCl 0.1 M, 298 K,  $(\text{NEA})/(\text{OAc})^- = 1 \cdot 10^{-3}$  M).

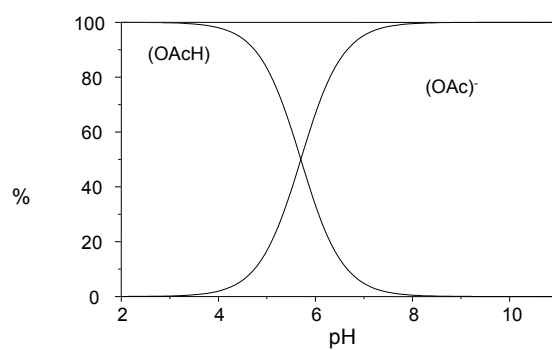

**Figure S5.** Distribution diagram for the protonated forms of OAcH ( $\text{H}_2\text{O}/\text{EtOH}$  1:1 (v/v), NaCl 0.1 M,  $T = 298\text{ K}$ ,  $[\text{OAcH}] = 1 \cdot 10^{-3}\text{ M}$ ).

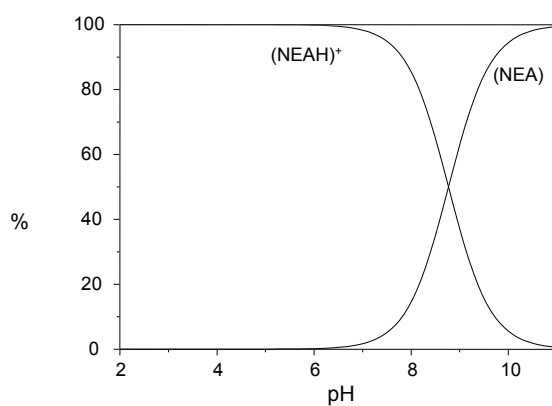

**Figure S6.** Distribution diagram for the protonated forms of NEA ( $\text{H}_2\text{O}/\text{EtOH}$  1:1 (v/v), NaCl 0.1 M,  $T = 298\text{ K}$ ,  $[\text{NEA}] = 1 \cdot 10^{-3}\text{ M}$ ).

**Table S3.** Comparison of dimension and zeta potential of the emulsion in pure water and in NaCl 0.1 M.

| Number | Conc IL (M)          | Solvent          | pH   | Diameter average (nm) | Z potential |
|--------|----------------------|------------------|------|-----------------------|-------------|
| 1      | $8.82 \cdot 10^{-5}$ | H <sub>2</sub> O | 7.0  | <b>209</b>            | <b>-53</b>  |
| 2      | $8.82 \cdot 10^{-5}$ | NaCl (0.1 M)     | 7.0  | <b>335</b>            | <b>-58</b>  |
| 3      | $8.82 \cdot 10^{-5}$ | NaCl(0.1 M)      | 10.7 | <b>100/400</b>        | <b>-56</b>  |

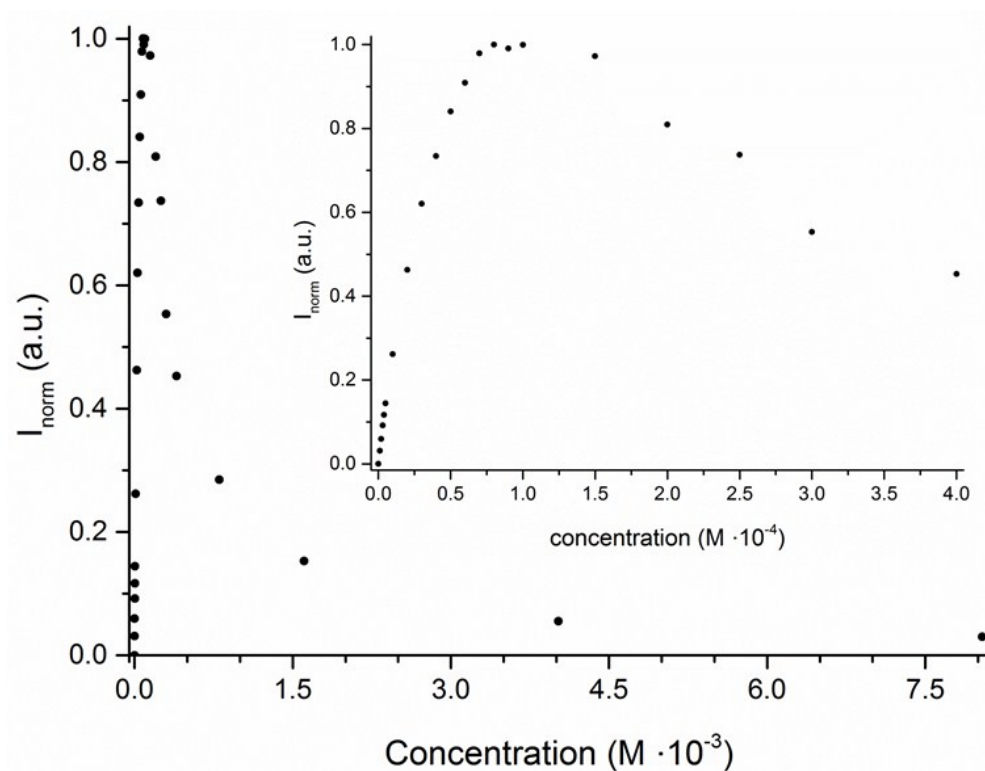

**Figure S7.** Changes in the fluorescence intensity of (NEAH)<sup>+</sup>/(OAc)<sup>-</sup> vs. concentration (M) in the range  $8.0 \cdot 10^{-3}$  M-  $1.0 \cdot 10^{-6}$  M. Inset: zoom in the concentration range  $4.0 \cdot 10^{-4}$  M-  $1.0 \cdot 10^{-6}$  M.

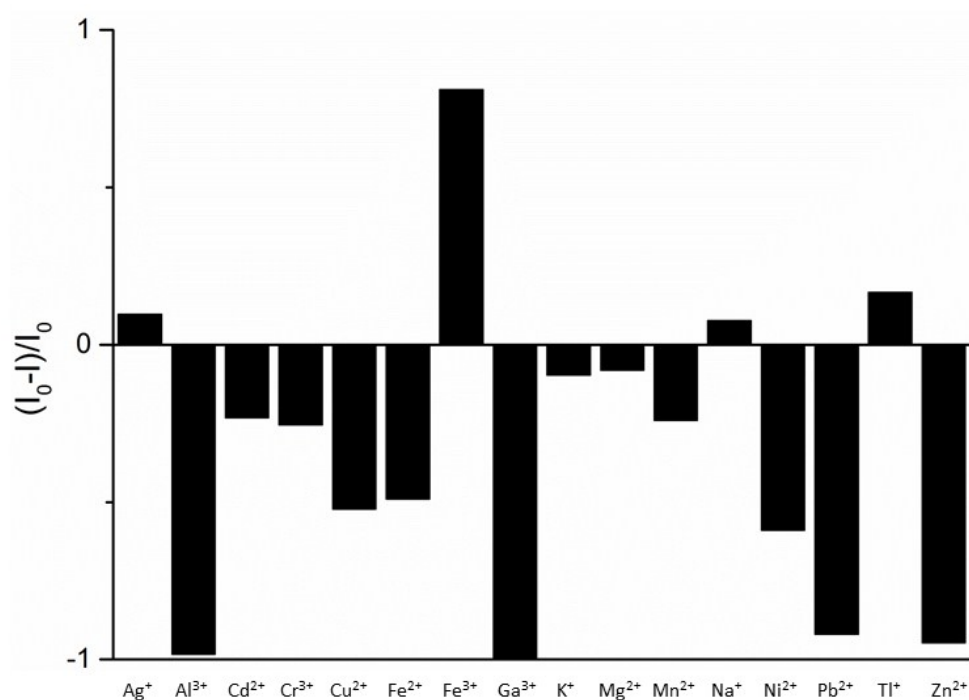

**Figure S8.** Changes in the fluorescence intensity reported as  $(I_0 - I)/I_0$  of  $(\text{NEAH})^+ / (\text{OAc})^-$  emulsion in water ( $\lambda_{\text{em}} = 333 \text{ nm}$ ,  $\lambda_{\text{exc}} = 281 \text{ nm}$ ) upon addition of 10 equivalents of different metal ions.  $(\text{NEAH})^+ / (\text{OAc})^- = 8.82 \cdot 10^{-5} \text{ M}$ ,  $[\text{M}]^{n+} = \text{Ag}^+$ ,  $\text{Al}^{3+}$ ,  $\text{Cd}^{2+}$ ,  $\text{Cr}^{3+}$ ,  $\text{Cu}^{2+}$ ,  $\text{Fe}^{2+}$ ,  $\text{Fe}^{3+}$ ,  $\text{Ga}^{3+}$ ,  $\text{K}^+$ ,  $\text{Mg}^{2+}$ ,  $\text{Mn}^{2+}$ ,  $\text{Na}^+$ ,  $\text{Ni}^{2+}$ ,  $\text{Pb}^{2+}$ ,  $\text{Tl}^+$ , and  $\text{Zn}^{2+}$ ).

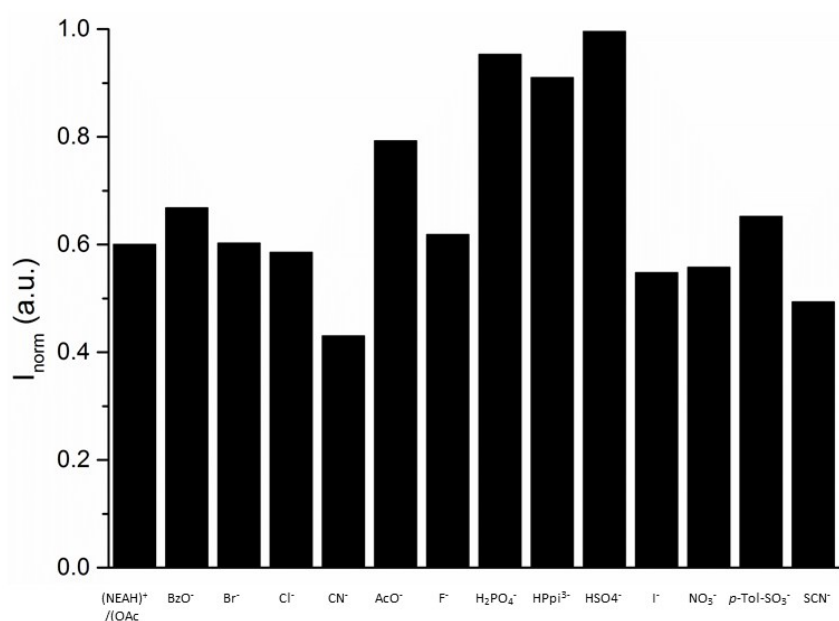

**Figure S9.** Changes in the fluorescence intensity of  $(\text{NEAH})^+ / (\text{OAc})^-$  emulsion in water ( $\lambda_{\text{em}} = 333 \text{ nm}$ ,  $\lambda_{\text{exc}} = 281 \text{ nm}$ ) upon addition of 10 equivalents of different anions.  $(\text{NEAH})^+ / (\text{OAc})^- = 8.82 \cdot 10^{-5} \text{ M}$ ,  $[\text{A}]^{n-} = \text{BzO}^-$ ,  $\text{Br}^-$ ,  $\text{Cl}^-$ ,  $\text{CN}^-$ ,  $\text{AcO}^-$ ,  $\text{F}^-$ ,  $\text{H}_2\text{PO}_4^-$ ,  $\text{HPpi}^{3-}$ ,  $\text{HSO}_4^-$ ,  $\text{I}^-$ ,  $\text{NO}_3^-$ , *p*-Tol-SO<sub>3</sub><sup>-</sup> and  $\text{SCN}^-$ ).



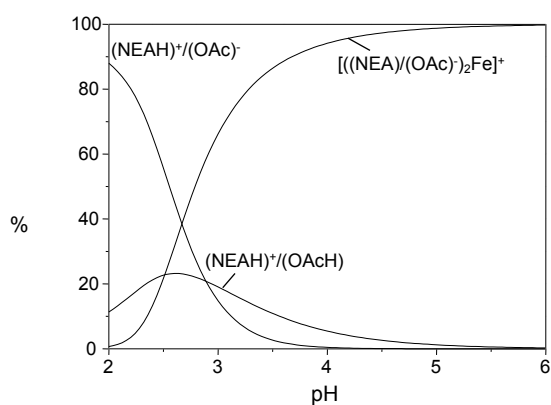

**Figure S10.** Distribution diagram of the complexes of (NEA)/(AOc)<sup>-</sup> emulsion with Fe<sup>3+</sup> (aqueous solution, NaCl 0.1 M, T = 298 K, [NEA] = [Fe<sup>3+</sup>] = 1·10<sup>-3</sup> M).

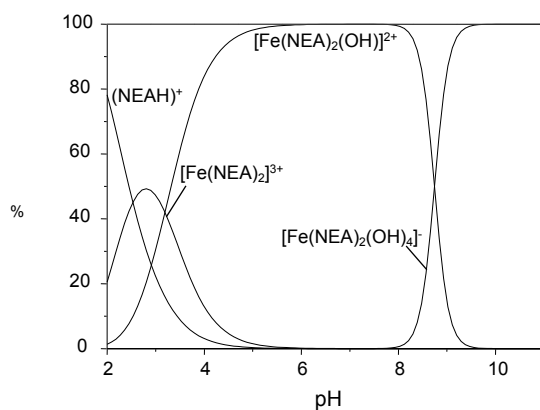

**Figure S11.** Distribution diagram of the complexes of NEA with Fe<sup>3+</sup> (H<sub>2</sub>O/EtOH 1:1 (v/v), NaCl 0.1 M, T = 298 K, [NEA] = [Fe<sup>3+</sup>] = 1·10<sup>-3</sup> M).
